# Supplementary material
Source: MDPI journal article supplement (https://www.mdpi.com/2312-7481/7/6/80)
Supplement: s1 [file s1 › magnetochemistry-1223104-supplementary.pdf]

# Supplementary Materials: The Effect of pH and Viscosity on Magnetophoretic Separation of Iron Oxide Nanoparticles

Leonie Wittmann, Chiara Turrina and Sebastian P. Schwaminger \*

Bioseparation Engineering Group, Department of Mechanical Engineering, Technical University of Munich, Boltzmanstr. 15, 85748 Garching b. München, Germany; l.wittmann@tum.de (L.W.); c.turrina@tum.de (C.T.)

\* Correspondence: s.schwaminger@tum.de

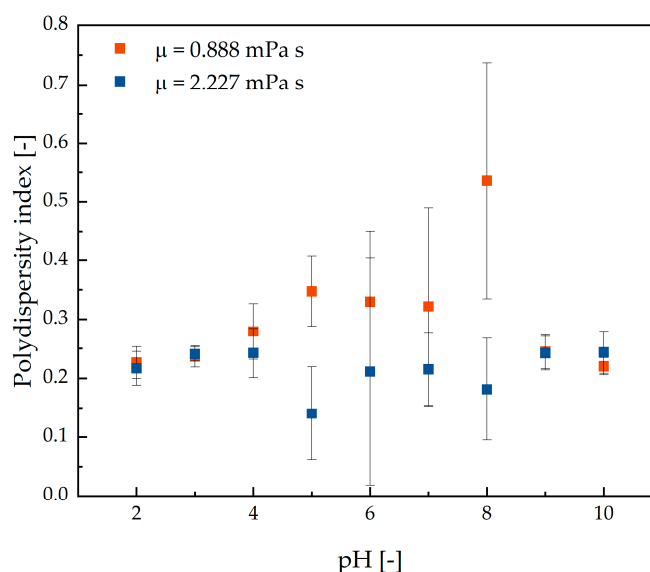

**Figure S1.** Polydispersity Index of BION suspension from pH 2 to 10 in deionized water ( $\eta = 0.888$  mPa s) and sucrose solution ( $\eta = 2.227$  mPa s).

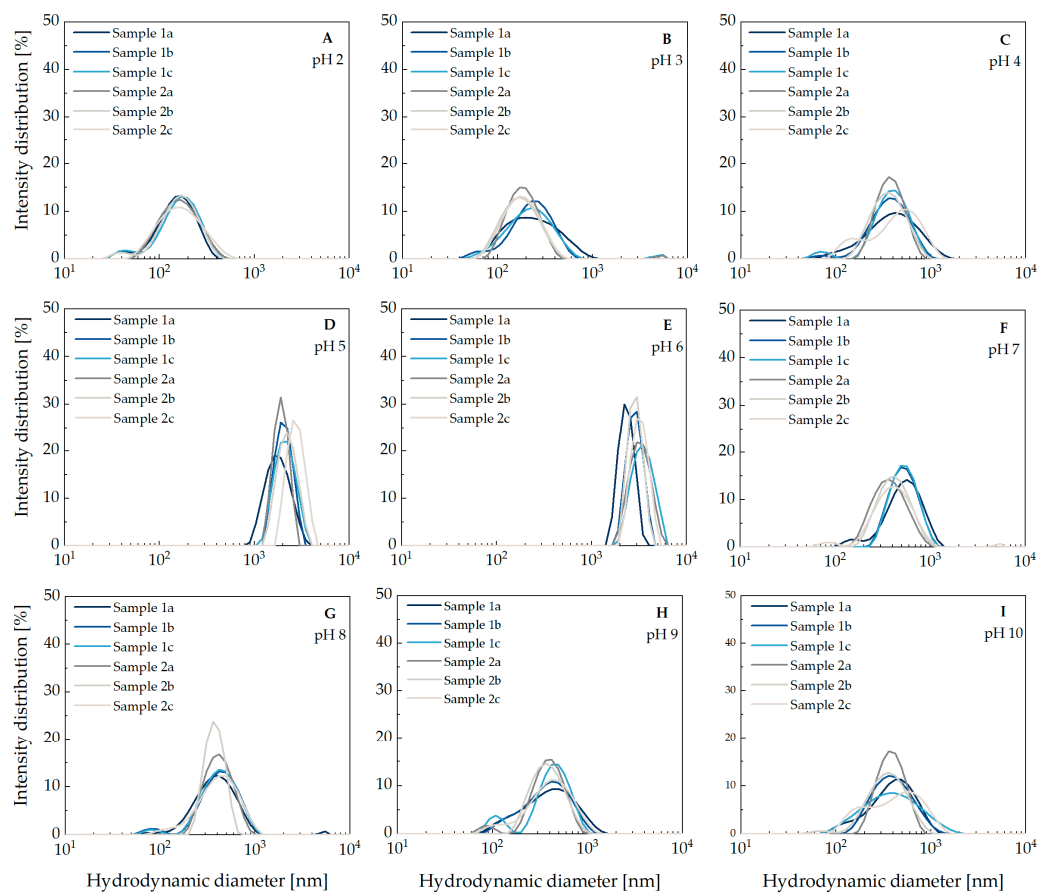

**Figure S2.** Intensity distribution data of pH 2 to 10 for high viscous BION suspension. Technical triplicates are shown for each duplicate.

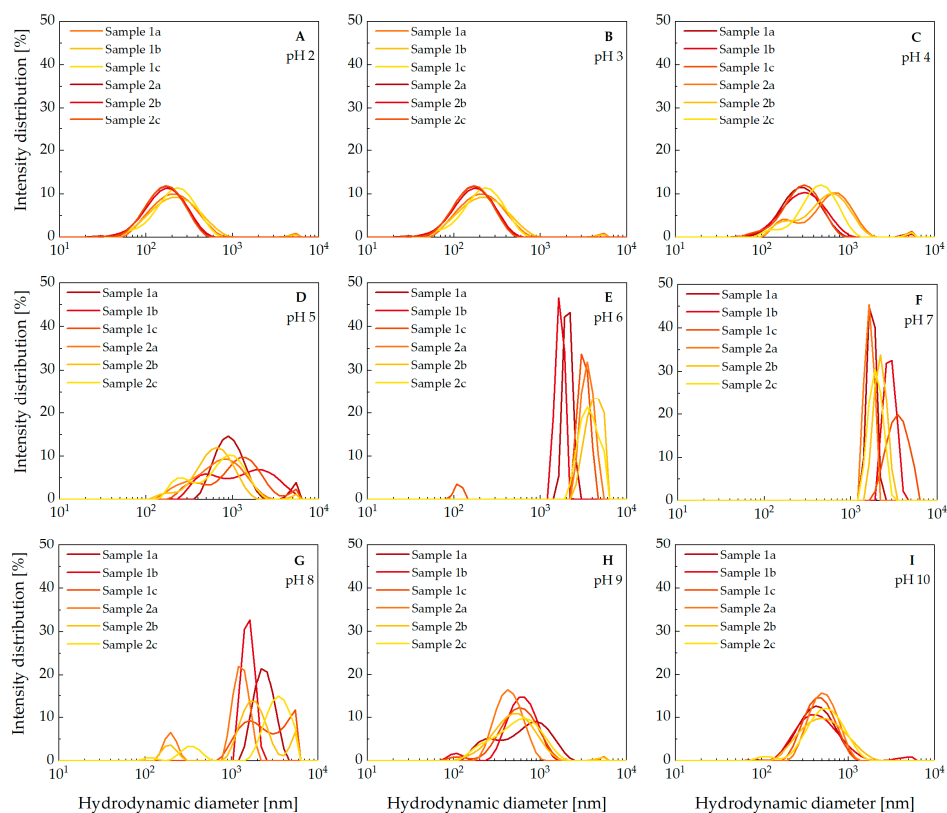

**Figure S3.** Intensity distribution data of pH 2 to 10 for low viscous BION suspension. Technical triplicates are shown for each duplicate.

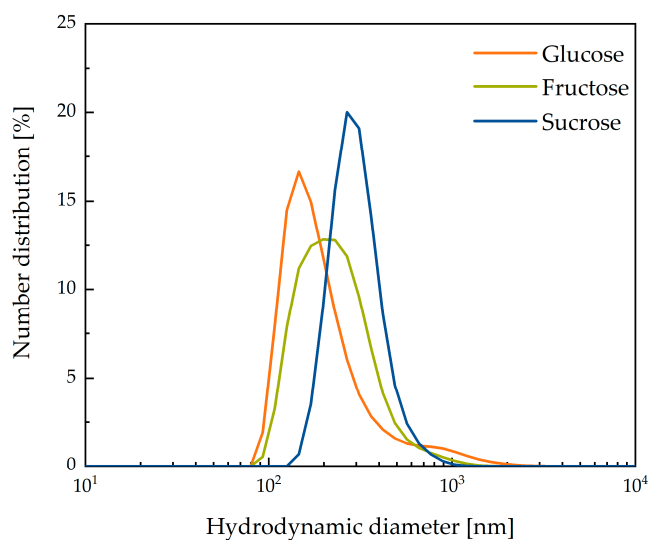

**Figure S4.** Number distribution of BIONS in fructose, glucose and sucrose solution at pH 7.
